# Supplementary material
Source: Research Square preprint supplement (doi:10.21203/rs.3.rs-9003184/v1)
Supplement: Supplementary file 1 [file bf14714eca2dccf7c0fb461d.docx]

**Appendix 1: Facility Questionnaire for Hypertension Service Availability and Readiness in Kilifi North and South sub-counties**

**Study objective:** To examine health facility readiness, health workers’ knowledge, and spatial accessibility to hypertension management in Kilifi County, Kenya

Hello, my name is _______________. I am an interviewer from KEMRI Wellcome Trust Research Programme. We are conducting a survey about primary care readiness for hypertension management in this facility. The results will be used to make sure that the services for hypertension patients in this community are responsive to patients’ healthcare needs.

# **000 Interviewer Identifier**

|  | **Interviewer Name** | **Autogenerate list** |  |
| --- | --- | --- | --- |

# **100 Facility identifiers**

|  | **Facility Identifiers** | **Response** | Skip |
| --- | --- | --- | --- |
| 101 | Facility unique ID | 00-00 |  |
| 102 | County | Drop down list |  |
| 103 | Sub County | Drop down list |  |
| 104 | Facility Name | Drop down list KMFL |  |
| 105 | Facility type | Dispensary  Health Center  Sub County Hospital  County Referral Hospital |  |
| 106 | Date of Interview |  |  |
| 107 | GPS Coordinates |  |  |
| 108 | Facility In-charge | Name: | Designation: |
| 109 | Facility In-charge contacts | Phone: | Email: |

# **200 Facility Characteristics**

**(Ask the facility in charge/manager)**

| 201 | What level is this Facility? | Level II  Level III  Level IV  Level V |  |
| --- | --- | --- | --- |
| 202a | Is this facility located in a rural or urban setting? | Rural  Urban |  |
| 202b | What is the approximate travel time (in minutes) by car or motorcycle from the facility to the county headquarters |  |  |
| 203 | Who owns this facility? | National Government  County Government |  |
| 204 | Do you know your catchment population? | Yes  No |  |
| 205 | What is the estimated size of the catchment population that this facility serves, that is, the target, or total population living in the area served by this facility |  |  |
| 206a | Does this facility operate around the clock? (i.e., 24 hours) (**on paper**) | Yes  No  Don’t Know |  |
| 206b | Does this facility operate round the clock? (**practically**) | Yes  No | If No, skip to 207 |
| 206c | At what time of the day does outpatient care start on weekdays? | 7:00  7:30  8:00  8:30  9:00  9:30  Other (specify) |  |
| 206d | At what time of the day does outpatient care start on Saturday? | 7:00  7:30  8:00  8:30  9:00  9:30  Closed on Saturday  Other (specify) |  |
| 206e | At what time of the day does outpatient care start on Sunday? | 7:00  7:30  8:00  8:30  9:00  9:30  Closed on Sunday  Other (specify) |  |
| 206f | At what time of the day does outpatient care start on holidays? | 7:00  7:30  8:00  8:30  9:00  9:30  Closed on Holidays  Other (specify) |  |
| 207 | Is this facility contracted by NHIF | Yes  No |  |
| 208 | Is client’s service charter available? (Ask to see it) | Yes  No |  |
| 209 | What services are offered in this facility? | [**Select all that are offered**]  Outpatient Services  Inpatient Services  Emergency Medical Services  Specialized Clinical Services (i.e., Paediatrics, Gynaecology)  Reproductive Health services (i.e., FP)  Maternity Services (Delivery, PNC, etc)  Comprehensive Care Center (CCC)  Pharmacy Services  Laboratory Services  Physiotherapy Services  Occupational Therapy Services  Ophthalmology  Dental Services  Theater Services  High dependency unit  Intensive Care Unit Services  Others (specify) |  |
| 210 | Does the facility have referral guidelines/strategy? (Ask to see it) | Yes (saw document)  Yes (did not see document)  No |  |
| 211a | Does this facility refer patients to other facilities? | Yes  No |  |
| 211b | Does this facility receive patients referred from other facilities or the community? | Yes  No |  |
| 212a | Does this facility have at least 10 standard referral forms available for referring patients to other facilities? (**Ask to see them**) | Yes  No |  |
| 212b | If **Yes**, have you experienced any stockouts of the standard referral forms in the **past 3 months?** | Yes  No |  |
| 213a | How many patients on average visit the general outpatient department in a day? |  |  |
| 213b | Record number of outpatient visits in the facility for the FY 2023/24 |  |  |
| 214 | Does this facility provide services for hypertension (e.g., screening, diagnosis and management) | Yes  No |  |
| 214 a | Do you have a specialized clinic for Non-communicable Disease (NCD) conditions like Hypertension or Diabetes Mellitus? | Yes  No, If No skip to Q 214c |  |
| 214b | 1. On average, how many hypertensive patients visit outpatient clinics on scheduled medical clinics? 2. On average, how many diabetes mellitus patients visit outpatient clinics on scheduled medical clinics? 3. On average, how many comorbid (hypertension and diabetes) patients visit outpatient clinics on scheduled medical clinics? 4. On average, how many OTHER NCD patients (e.g., cancer, chronic obstructive pulmonary diseases, mental disorders etc.) visit the outpatient department on scheduled medical clinics? |  |  |
| 214c | 1. On average, how many hypertensive patients visit outpatient department on a typical day? 2. On average, how many diabetes mellitus patients visit outpatient department on a typical day? 3. On average, how many comorbid (hypertension and diabetes) patients visit outpatient department on a typical day 4. On average, how many OTHER NCD patients (e.g., cancer, chronic obstructive pulmonary diseases, mental disorders etc.) visit the outpatient department on a typical day? |  |  |
| 214d | 1. Record number of hypertension cases in the facility for the FY 2023/24 2. Record number of diabetes mellitus cases in the facility for the FY 2023/24 3. Record number of comorbid (hypertension and diabetes) cases in the facility for the FY 2023/24 4. Record number of total NCD cases in the facility for the FY 2023/24 |  |  |
| 215a | How many health workers (e.g., doctors, clinicians, nurses) on average do you have in the general Out-patient department (OPD) department attending patients on a typical day? |  |  |
| 215b | How many health workers are assigned to the Medical Outpatient Clinic (MOPC)/ outpatient department to attend to hypertension patients? |  |  |
| 215c | Please indicate the **cadre** and **number** health workers assigned to MOPC/outpatient department to attend to hypertension patients  **[Select cadre]**   1. Nurses 2. Clinical officers 3. Medical officers 4. Consultant physicians 5. Other (Specify) | **[Indicate number of assigned health workers per cadre]** |  |

# **300 General Service Readiness**

|  | **I am now going to ask questions on general service readiness including electricity, water, means of communication, transport for referrals and infrastructure** |  |  |
| --- | --- | --- | --- |
| 300a | What is the main source of electricity for the facility? | 0 No power supply  1 Electric power grid  2 Fuel operated generator  3 Battery operated generator  4 Solar system  96 Other, (specify) | If 0, skip to 302? |
| 300b | Thinking back over the last **seven** days, has the power from the grid or a power back up been interrupted for more than half an hour at a time at this facility? | Yes  No |  |
| 301a | Is there a reliable backup electricity supply available?  *(Reliable is defined as providing the facility with electricity supply to meet all its needs while the main water source is not functioning)* | Yes  No | If No, skip to 302 |
| 301b | What are the sources of backup electricity? | 1 Electric power grid  2 Fuel operated generator  3 Battery operated generator  4 Solar system  96 Other, (specify) |  |
| 302a | What is the main source of water for this facility? | 1 Piped water form municipality  2 Borehole (Hand pump)  3 Borehole (solar pump)  4 Borehole (Electric pump)  5 Well (handpump)  6 Well (Electric pump)  7 Well (solar pump)  8 River  9 Tank  10 Rainwater  96 Other (specify below)  0 No water | If no, skip to 303? |
| 302b | Is there a time of the year when the facility routinely has a shortage or lack of water? (**Routinely is defined facility is unable to meet its water demands resulting in interruptions to facility functioning**) | Yes  No |  |
| 302c | Is there a reliable backup water supply available? (**Reliable is defined as providing the facility with water supply to meet all its needs while the main water source is not available**) | Yes  No | If No skip to 303 |
| 302d | What are the sources of backup water? (Select all that apply) | 1 Piped water form municipality  2 Borehole (Hand pump)  3 Borehole (solar pump)  4 Borehole (Electric pump)  5 Well (handpump)  6 Well (Electric pump)  7 Well (solar pump)  8 River  9 Tank  10 Rainwater  96 Other (specify below) |  |
| 303a | Which of the following communication units are available and functional at the facility today? |  |  |
| 303b | Cell phone owned by facility | Available today and functional  Available today but not functional  Not available today |  |
| 303c | Cell phone provided to individual staff | Available today and functional  Available today but not functional  Not available today |  |
| 303d | Internet connection | Available today and functional  Available today but not functional  Not available today |  |
| 303e | Do you have a functioning computer at this facility? | Yes  No  Yes, but not observed |  |
| 303f | Does the computer have internet access? | Yes  No |  |
| 303g | Is the internet access reliable? (**Reliable is defined as providing the facility with internet access to meet all its needs at all times**) | Very reliable  Fairly reliable  Not reliable |  |
| 304a | Does the Facility have an outpatient Department | Yes  No |  |
| 304b | If **Yes**, does the department have consultation rooms? | Yes  No |  |
| 304c | Indicate number of rooms if yes |  |  |
| 305a | Does the Facility have an Inpatient Department | Yes  No | If No, skip to Q306 |
| 305b | If **Yes,** what is the inpatient bed capacity for this facility? |  |  |
| 305c | Are there separate toilet facilities in every inpatient ward? (Check all wards) | Available today and functional in all wards  Available today and functional in some wards  Available today but not functional  Not available today | Skip if it’s Outpatient only facility |
| 306 | Are staff toilets available? | Available today and functional  Available today but not functional  Not available today |  |
| 307 | Are hand washing facilities available next to all toilets (Physically check) | Available today and functional  Available today but not functional  Not available today |  |
| 308 | Where does this facility most often refer patients who need services that cannot be provided here? | 1 National Referral Hospital  2 The county referral hospital located in the same county as facility  3 A referral hospital in a different county  3 A Sub County referral hospital located in the same sub county as facility  5 A sub county referral hospital in a different subcounty  6 Private/Faith-Based health facility  7 Other (specify) |  |
| 309a | Does this facility have access to emergency transportation (an ambulance or other vehicle) for clients that is either stationed at the facility or that you can call for? | Yes ambulance  Yes other type of vehicle  No |  |
| 309b | Is fuel for the ambulance/vehicle available today? | Yes  No  Don’t know |  |

**400 Hypertension Equipment Availability**

(Ask the facility in charge/designate)

|  | **Now I am going to ask you questions on the availability of basic equipment and tools for hypertension management (number of functional devices available)** |  | **Number functional** |
| --- | --- | --- | --- |
| **400a** | BP machine | Yes  No |  |
| **400b** | BP machine batteries | Yes  No  Not applicable |  |
| **401a** | Weighing machine | Yes  No |  |
| **401b** | Has the weighing machine been calibrated? | Yes  No  Don’t know |  |
| **401c** | **If Yes,** when was the last time it was calibrated? | < 3 months  6 months to 1 year  >1 year |  |
| **402** | Height meter | Yes  No |  |
| **403** | Thermometer | Yes  No |  |
| **404** | Measuring tape | Yes  No |  |
| **405** | Stethoscope | Yes  No |  |
| **406** | Ophthalmoscope | Yes  No |  |
| **407** | Data collection and reporting tools (e.g., MoH registers, Health Information System etc.) | Yes  No |  |
| **408** | **CVD risk assessment tools** |  |  |
| **1a** | ECG Machine | Yes  No |  |
| **1b** | ECG thermal paper | Yes  No |  |
| **2** | Strips for urinalysis | Yes  No |  |
| **3a** | Glucometer | Yes  No |  |
| **3b** | Glucometer strips | Yes  No |  |
| **4a** | Biochemistry equipment | Yes  No |  |
| **4b** | Biochemistry reagents | Yes  No |  |
| **5a** | Hematology equipment | Yes  No |  |
| **5b** | Hematology reagents | Yes  No |  |
| **6** | X-ray | Yes  No |  |

**500 Availability of Hypertension Services**

(Ask the facility in charge/designate)

|  | Now I am going to ask you questions on the **availability** **of hypertension services** in the health facility | **Responses** |
| --- | --- | --- |
| **500a** | Do you offer hypertension outreach services in the community? | Yes  No |
| **500b** | If **Yes,** which type of outreach activity do you conduct? | 1. Health promotion 2. Hypertension screening and diagnosis 3. Hypertension treatment 4. Treatment adherence support 5. Other (Specify) |
| **501a** | Do you have dedicated medical outpatient clinic days for hypertension? | Yes  No |
| **501b** | If **Yes,** how many hypertension clinic days do you have in a week? |  |
| **502a** | Do you offer the following hypertension services in this facility? |  |
| **502b** | Promotion/Prevention e.g., lifestyle intervention/advice (tobacco cessation, physical activity, diet) | Yes  No |
| **502c** | Screening | Yes  No |
| **502d** | Diagnosis | Yes  No |
| **502e** | Treatment | Yes  No |
| **502f** | Follow-up | Yes  No |
| **502g** | Treatment adherence support | Yes  No |
| **502h** | Referral | Yes  No |
| **502i** | If Yes, what are the reasons for referral of hypertension patients (**You can select more than one reason**) | 1. For specialist review 2. Lack of trained staff 3. Lack of necessary equipment 4. Lack of drugs 5. Other (Specify) |
| **503a** | Availability of hypertension treatment guidelines | Yes, observed  Yes, reported not seen  No |
| **503b** | If **observed/reported,** indicate the hypertension treatment guideline available in the health facility | 1. **2018** Kenya national guidelines for cardiovascular diseases management 2. **2024** Kenya national guidelines for the management of cardiovascular diseases 3. Other (specify) |
| **504** | Availability of hypertension information, education, and communication (IEC) materials  NB: If Yes, ask to see a copy and take a picture | Yes, observed  Yes, reported not seen  No |
| **505** | What would you say the status of adherence to hypertension treatment guidelines in this facility? | 1. Majority of service providers **follow** the guidelines without problems 2. Guidelines can **sometimes not be followed** because of lack of equipment, supplies, training or other reasons 3. Guidelines can **usually not be followed** because of lack of equipment, supplies or training or other reasons |
| **506a** | Have you had hypertension or NCD supervisory visits within the past **3 months?** | Yes  No |
| **506b** | If **Yes,** who conducted the supervisory visit? | 1. Sub-county Health Management Team 2. County Health Management Team 3. NCD Partner 4. National Ministry of Health 5. Other (Specify) |

# **600 Health Workforce Availability, Training and Knowledge**

**Dispensaries**

| **Cadre** | **601a How many health workers in total are in the Facility?** | **601b of the total, how many are Permanent and pensionable** | **601c How many are Contracted by the county government** | **601d How many were contracted through UHC?** | **601e How many have other Contracts (NGOs etc.)** | **601f Volunteer** | **602a How many are to be on duty today as per roster** | **602b How many are on duty today and working?** | **602c How many are absent without permission *(absconded)*** | **602d How many are absent with permission *(like training/official duty)*** |
| --- | --- | --- | --- | --- | --- | --- | --- | --- | --- | --- |
| Registered Nurses |  |  |  |  |  |  |  |  |  |  |
| Enrolled Nurses |  |  |  |  |  |  |  |  |  |  |
| Registered Midwives |  |  |  |  |  |  |  |  |  |  |
| Public Health Officers |  |  |  |  |  |  |  |  |  |  |
| Community Health Promoters |  |  |  |  |  |  |  |  |  |  |
| Community Health Assistants |  |  |  |  |  |  |  |  |  |  |
| Cleaners/Housekeeping staff |  |  |  |  |  |  |  |  |  |  |
| Clinical officer |  |  |  |  |  |  |  |  |  |  |
| Lab technologist |  |  |  |  |  |  |  |  |  |  |
| Mentor mother |  |  |  |  |  |  |  |  |  |  |
| Child & Adolescent Treatment Supporter |  |  |  |  |  |  |  |  |  |  |
| Volunteer |  |  |  |  |  |  |  |  |  |  |
| Other (Specify) |  |  |  |  |  |  |  |  |  |  |

**603a** Has any frontline health worker been trained on hypertension management?

1) In past year

2) Before last year

3) Never

**603b** If **Yes** to the above question, how many were trained? ______

**603c** Which cadre of health workers were trained?

1. Community Health Promoters
2. Community Health Assistants
3. Nurses
4. Clinical officers
5. Medical officers
6. Other (Specify)

**603d** Which organization/individual supported/offered the training? ______

1. Sub-county Health Management Team
2. County Health Management Team
3. NCD Partner
4. National Ministry of Health
5. Other (Specify)

**Health Centers**

| **Cadre** | **604a How many health workers in total are in the Facility?** | **604b of the total, how many are Permanent and pensionable** | **604c How many are Contracted by the county government** | **604d How many were contracted through UHC?** | **604ee How many have other Contracts (NGOs etc.)** | **605a How many are to be on duty today as per roster** | **605b How many are on duty today and working?** | **605cHow many are absent without permission** | **605d How many are absent with permission** |
| --- | --- | --- | --- | --- | --- | --- | --- | --- | --- |
| Medical officers |  |  |  |  |  |  |  |  |  |
| Clinical Officers |  |  |  |  |  |  |  |  |  |
| Registered Nurses |  |  |  |  |  |  |  |  |  |
| Enrolled Nurses |  |  |  |  |  |  |  |  |  |
| Laboratory Technologist |  |  |  |  |  |  |  |  |  |
| Registered Midwives |  |  |  |  |  |  |  |  |  |
| Public Health Officers |  |  |  |  |  |  |  |  |  |
| Community Health Assistants |  |  |  |  |  |  |  |  |  |
| Community Health Promoters |  |  |  |  |  |  |  |  |  |
| Social Workers |  |  |  |  |  |  |  |  |  |
| Nutritionists |  |  |  |  |  |  |  |  |  |
| Pharmacy technologists |  |  |  |  |  |  |  |  |  |
| Health Records Information Officers |  |  |  |  |  |  |  |  |  |
| Health Administrative Officers |  |  |  |  |  |  |  |  |  |
| Clerks |  |  |  |  |  |  |  |  |  |
| Secretaries |  |  |  |  |  |  |  |  |  |
| Accountants |  |  |  |  |  |  |  |  |  |
| Cleaners/housekeeping staff |  |  |  |  |  |  |  |  |  |
| Laundry/cooking staff |  |  |  |  |  |  |  |  |  |
| Other (Specify) |  |  |  |  |  |  |  |  |  |

**606a** Has any frontline health worker been trained on hypertension management?

1) In past year

2) Before last year

3) Never

**606b** If **Yes** to above question, how many were trained? ____

**606c** Which cadre of health workers were trained?

1. Community Health Promoters
2. Community Health Assistants
3. Nursing officers
4. Clinical officers
5. Medical officers
6. Other (Specify)

**606c** Which organization/individual supported/offered the training?

1. Sub-county Health Management Team
2. County Health Management Team
3. NCD Partner
4. National Ministry of Health
5. Other (Specify)

**Primary Hospitals (Sub-County/County Hospitals)**

| **Cadre** | **607a How many health workers in total are in the Facility?** | **607b of the total, how many are Permanent and pensionable** | **607c How many are Contracted by the county government** | **607d How many were contracted through UHC?** | **607ee How many have other Contracts (NGos etc)** | **608a How many are to be on duty today as per roster** | **608b How many are on duty today and working?** | **608c How many are absent without permission** | **608d How many are absent with permission** |
| --- | --- | --- | --- | --- | --- | --- | --- | --- | --- |
| **Physician** |  |  |  |  |  |  |  |  |  |
| **Pediatrician** |  |  |  |  |  |  |  |  |  |
| Medical officers |  |  |  |  |  |  |  |  |  |
| Obstetricians/Gynecologists |  |  |  |  |  |  |  |  |  |
| General Surgeons |  |  |  |  |  |  |  |  |  |
| Radiologists |  |  |  |  |  |  |  |  |  |
| Ophthalmologists |  |  |  |  |  |  |  |  |  |
| Orthopedics |  |  |  |  |  |  |  |  |  |
| Clinical Officers |  |  |  |  |  |  |  |  |  |
| Registered Nurses |  |  |  |  |  |  |  |  |  |
| Enrolled Nurses |  |  |  |  |  |  |  |  |  |
| Registered Midwives |  |  |  |  |  |  |  |  |  |
| Social Workers |  |  |  |  |  |  |  |  |  |
| General Physiotherapists |  |  |  |  |  |  |  |  |  |
| Occupational Therapists |  |  |  |  |  |  |  |  |  |
| Nutritionists |  |  |  |  |  |  |  |  |  |
| Medical Laboratory Technologists |  |  |  |  |  |  |  |  |  |
| Dentists |  |  |  |  |  |  |  |  |  |
| Echocardiographer |  |  |  |  |  |  |  |  |  |
| Radiologist |  |  |  |  |  |  |  |  |  |
| Radiographers |  |  |  |  |  |  |  |  |  |
| Pharmacists |  |  |  |  |  |  |  |  |  |
| Pharmacy technologists |  |  |  |  |  |  |  |  |  |
| Health Records Information Officers |  |  |  |  |  |  |  |  |  |
| Health Administrative Officers |  |  |  |  |  |  |  |  |  |
| Clerks |  |  |  |  |  |  |  |  |  |
| Secretaries |  |  |  |  |  |  |  |  |  |
| Accountants |  |  |  |  |  |  |  |  |  |
| Cleaners/housekeeping staff |  |  |  |  |  |  |  |  |  |
| Laundry/cooking staff |  |  |  |  |  |  |  |  |  |
| Other (Specify) |  |  |  |  |  |  |  |  |  |

**609aa** Has any frontline health worker been trained on hypertension management?

1) In past year

2) Before last year

3) Never

**609b** If **Yes** to above question, how many were trained? _____

**609c** Which cadre of health workers were trained?

1. Nursing officers
2. Clinical officers
3. Medical officers
4. Consultant physician
5. Other (Specify)

**609d** Which organization/individual supported/offered the training?

1. Sub-county Health Management Team
2. County Health Management Team
3. NCD Partner
4. National Ministry of Health
5. Other (Specify)

**Frontline health worker knowledge assessment**

This part of the questionnaire is to be administered to **ANY** frontline health worker who manages hypertension patients at the health facility.

**610a** What is the cadre of the frontline health worker?

1. Nursing officer
2. Clinical officer
3. Medical officer
4. Consultant Physician
5. Other (Specify)

**610b** How can you rate your confidence and knowledge in managing hypertension?

1) Good

2) Satisfactory

3) Poor

**610c** Are you conversant with the latest hypertension/cardiovascular treatment guidelines?

1. Yes
2. No

**610d** If **Yes**, please provide the name of the hypertension/cardiovascular treatment guidelines you are familiar with:

- 1. **2018** Kenya national guidelines for cardiovascular diseases management
  2. **2024** Kenya national guidelines for the management of cardiovascular diseases
  3. Other (specify)

**Case scenario:** Assume a patient comes to see you at this health facility. He is 40 years old. He asks for treatment of frequent headache. He denies any history of fevers. The patient tells you that he had his blood pressure measured 1 month ago and it was 155/105 mmHg. His body mass index is 29 kg / m2.

| **Question #** | **Question** | **Responses** |
| --- | --- | --- |
| 611 | At the first visit it is important to ask about other symptoms, conduct a brief general examination, and take blood pressure (BP) on both arms. | 1. True 2. False 3. I don’t know |
| 612 | The basic package of investigations after hypertension diagnosis or during follow-up includes Blood tests: Total blood count, Urea Electrolyte Creatinine, lipid profile, blood glucose | 1. True 2. False 3. I don’t know |
| 613 | The headaches that this patient is experiencing are most likely due to malaria. | 1. True 2. False 3. I don’t know |
| 614 | This patient probably does not have hypertension since hypertension is defined as a systolic blood pressure of greater than 160mmHg. | 1. True 2. False 3. I don’t know |
| 615 | High blood pressure can be a dangerous disease and therefore must only be managed in a well-equipped hospital (not a dispensary or a health center). | 1. True 2. False 3. I don’t know |
| 616 | For patients with high blood pressure, it is important to educate them to not add salt to food, to reduce weight if he/she is overweight, and to perform regular exercise. | 1. True 2. False 3. I don’t know |
| 617 | The overall aim of the treatment of hypertension is the adequate control of blood pressure and the control of other risk factors to reduce morbidity and mortality. | 1. True 2. False 3. I don’t know |
| 618 | If drug therapy is indicated for hypertension, calcium channel blocker-based combination therapy is the preferred initial treatment with the use of single pill combinations advocated to enhance adherence | 1. True 2. False 3. I don’t know |
| 619 | If the blood pressure remains greater than 160/100 mmHg with first-line therapy, the best course of action is to stop that drug and to start the patient on another drug like diazepam or furosemide. | 1. True 2. False 3. I don’t know |
| 620 | In patients with hypertension, medications can usually be stopped as soon as the blood pressure is normal. | 1. True 2. False 3. I don’t know |
| 621 | Possible serious complications of chronic, untreated high blood pressure include stroke, kidney failure, heart failure, infarction of the heart | 1. True 2. False 3. I don’t know |
| 622 | In the first year after being started on antihypertensive treatment, a person with hypertension only needs to return to clinic every 6 months in order to check blood pressure, receive further counselling and adjustments in medications. | 1. True 2. False 3. I don’t know |
| 623 | Patients who are not reaching their blood pressure goal after a reasonable trial of antihypertensive therapy (3 months) should be referred if the requisite expertise is not available at the health facility. | 1. True 2. False 3. I don’t know |

# **700 Availability of Antihypertensive Medicines**

|  |  | **Level of Use** | **Source of medication** | **Availability and expiry status** | **Experience of drug stock-out** | **If out-of-stock, how long have they been out of stock?** |
| --- | --- | --- | --- | --- | --- | --- |
| 701 | **Are any of the following hypertension medicines available in the facility today? (check at the pharmacy and ask to see them)** |  | 1. KEMSA 2. Sub-county pharmacist 3. Borrowed from neighboring facility 4. Patient pooling/contributions 5. Other (Specify) | 1. Available **NOT** expired. 2. Available **BUT** expired. 3. **NOT available** 4. Available **BUT** expired | 1. Never 2. Occasionally 3. Often 4. Always 5. Not stocked | 1. < 1 week 2. 1 week to < 1 month 3. 1 month or longer |
|  | **Angiotensin converting enzyme (ACE) Inhibitors (ACEIs)** |  |  |  |  |  |
| 701a | Enalapril | 3 |  |  |  |  |
|  | **Angiotensin Receptor Blockers (ARBs)** |  |  |  |  |  |
| 701b | Losartan | 3 |  |  |  |  |
| 701c | Telmisartan | 4 |  |  |  |  |
|  | **Beta Blockers (BBs)** |  |  |  |  |  |
| 701d | Bisoprolol | 4 |  |  |  |  |
| 701e | Labetalol | 3/4 |  |  |  |  |
| 701f | Metoprolol | 3 |  |  |  |  |
| 701g | Nebivolol | 3 |  |  |  |  |
|  | **Calcium channel Blockers (CCBs)** |  |  |  |  |  |
| 701h | Amlodipine | 3 |  |  |  |  |
| 701i | Nifedipine | 3 |  |  |  |  |
|  | **Thiazide & Thiazide-like Diuretics** |  |  |  |  |  |
| 701j | Chlorthalidone | 4 |  |  |  |  |
| 701k | Hydrochlorothiazide (HCTZ) | 3 |  |  |  |  |
| 701l | Indapamide | 4 |  |  |  |  |
|  | **Other anti-hypertensive agents** |  |  |  |  |  |
|  | 1. **Centrally acting antihypertensive agents** |  |  |  |  |  |
| 701m | Methyldopa | 4 |  |  |  |  |
|  | 1. **Potassium sparing Diuretics** |  |  |  |  |  |
| 701n | Spironolactone | 4 |  |  |  |  |
|  | 1. **Vasodilators** |  |  |  |  |  |
| 7010 | Hydralazine | 3/4 |  |  |  |  |
|  | 1. **Alpha 1 Receptor Blockers** |  |  |  |  |  |
| 701p | Doxazosin | 4 |  |  |  |  |
| 701q | Prazosin | 4 |  |  |  |  |
|  | 1. **Non-selective alpha adrenoceptor antagonist** |  |  |  |  |  |
| 701r | Phenoxybenzamine | 5 |  |  |  |  |
|  | 1. **Combination Antihypertensive medicines** |  |  |  |  |  |
| 701s | Amlodipine + Hydrochlorothiazide (HCTZ) | 3 |  |  |  |  |
| 701t | Amlodipine + Indapamide | 3 |  |  |  |  |
| 701u | Losartan + Hydrochlorothiazide (HCTZ) | 3 |  |  |  |  |
| 701v | Lisinopril + Hydrochlorothiazide (HCTZ) | 3 |  |  |  |  |
|  | Perindopril + Amlodipine | 3/5 |  |  |  |  |
|  | Perindopril + Amlodipine + Indapamide | 4 |  |  |  |  |
| 701w | Telmisartan + Amlodipine | 3 |  |  |  |  |
| 701x | Telmisartan+ Amlodipine+ Hydrochlorothiazide (HCTZ) | 4 |  |  |  |  |
| 701y | Telmisartan + Hydrochlorothiazide (HCTZ) | 3 |  |  |  |  |
|  | 1. **Others (allow for specification/addition)** |  |  |  |  |  |
| 701z | Bosentan | 4 |  |  |  |  |
| 701za | Sildenafil | 4 |  |  |  |  |
| 701zb | Tadalafil | 4 |  |  |  |  |
