# Supplementary material
Source: Research Square preprint supplement (doi:10.21203/rs.3.rs-9003184/v1)
Supplement: Supplementary file 2 [file f3e505b8ec0748408ddcf52f.docx]

**Appendix 1: Study setting characteristics and supplementary results**

**Table A1** Demographic and health indicators in Kilifi County

| Indicator |  |
| --- | --- |
| Total population (2019) | 1,453,787 |
| Male | 704,089 |
| Female | 749,673 |
| Intersex | 25 |
| Share of rural population | 77% |
| Poverty rate | 46.1% |
| Health insurance coverage | 12% |
| Estimated hypertension prevalence | 26.5% |
| Health Personnel (Public sector in 2023) |  |
| Nurses per 10,000 people | 4 |
| Doctors per 10,000 people | 1 |
| Health Facilities (2022) |  |
| Dispensaries | 132 |
| Health Centres | 18 |
| Public Hospitals | 9 |
| Faith-based facilities | 25 |
| Private for-profit health facilities | 186 |

Source: (1)


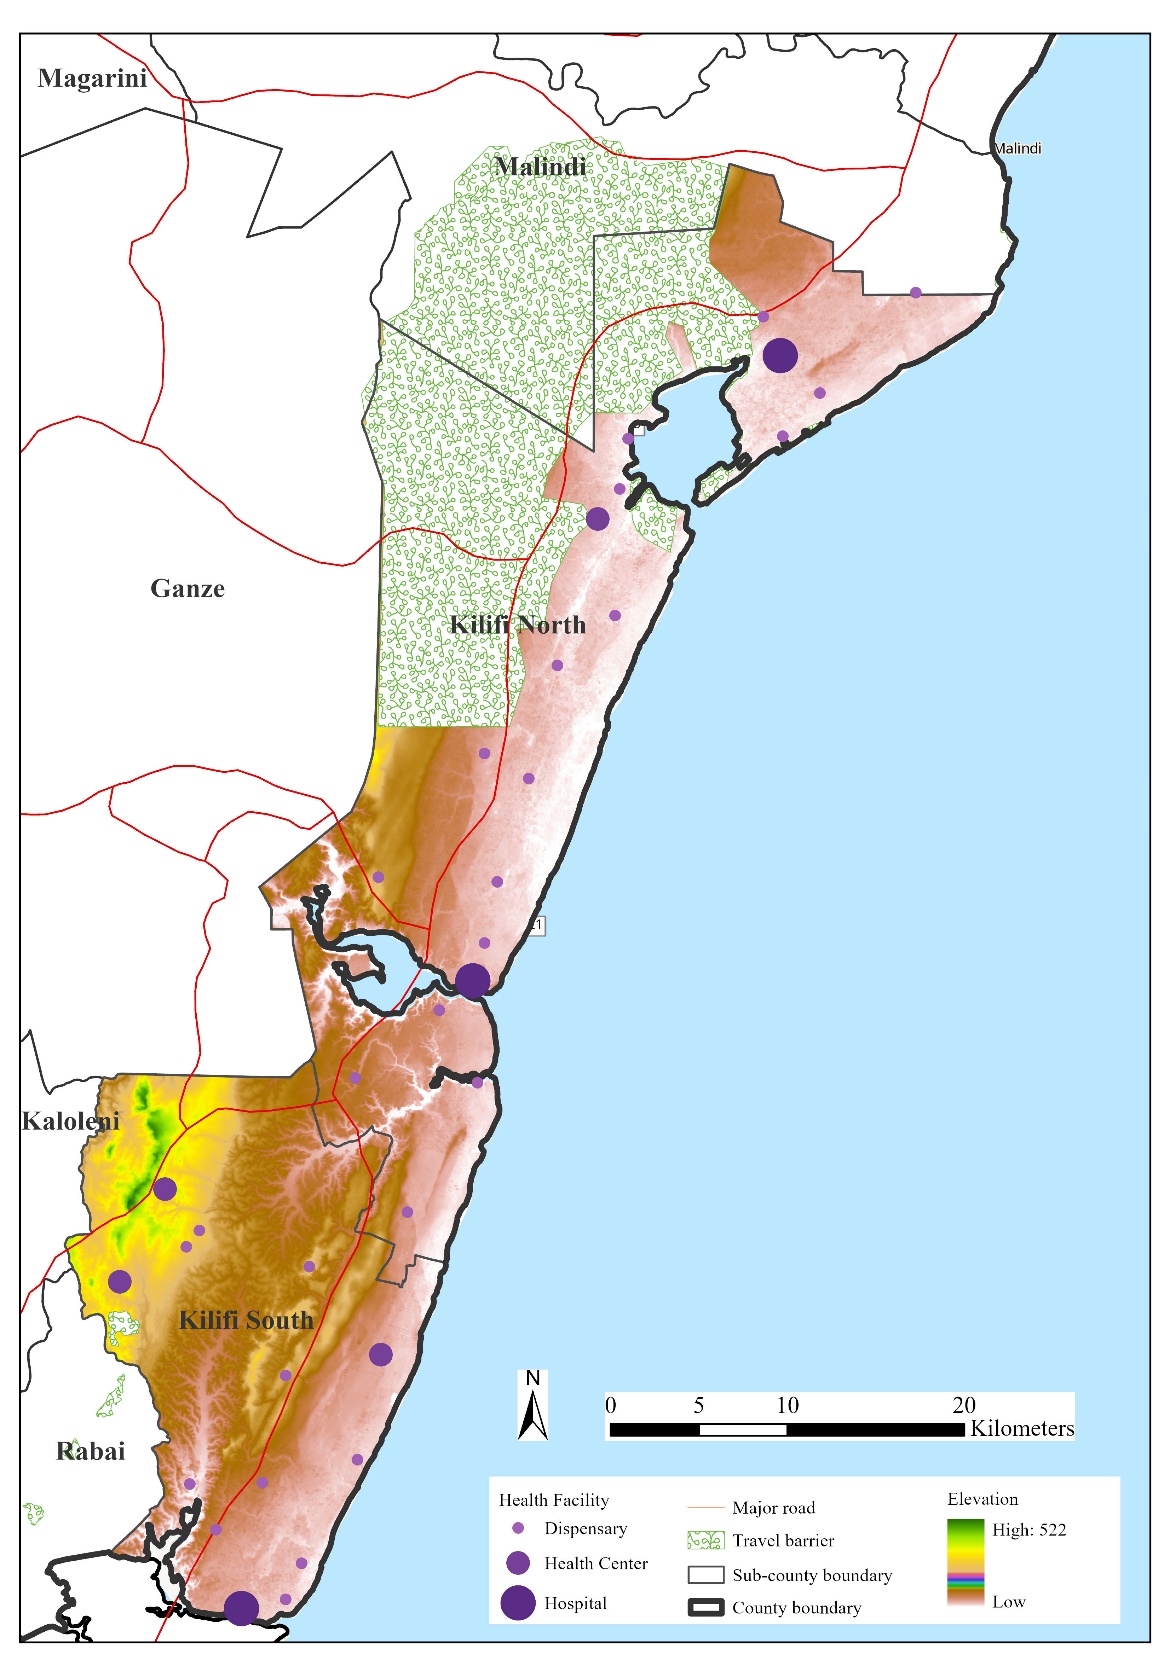


**Figure A1** Map of Kilifi North and Kilifi South sub-counties, Kilifi County

**Figure A2** Comparison of weighting approaches for facility readiness

**Table A2:** Knowledge Score Comparisons by Facility Type

| Comparison | Mean Difference | 95% CI | *p*-value |
| --- | --- | --- | --- |
| ANOVA overall | - | - | 0.001 |
| Hospital vs. Dispensary | 1.16 points | 0.42 to 1.89 | <0.001* |
| Hospital vs. Health Centre | 0.49 points | -0.54 to 1.51 | 0.49 |
| Health Centre vs. Dispensary | 0.67 points | -0.22 to 1.55 | 0.16 |

*Tukey-adjusted

**Table A3:** Knowledge by Facility Readiness Status

| Readiness Status | n | Mean Score (95% CI) | %Score  (95% CI) | *p*-value |
| --- | --- | --- | --- | --- |
| Not ready (<70%) | 57 | 11.7 (11.4-12.0) | 89.7 (87.3-92.2) | 0.003 |
| Ready (≥70%) | 16 | 12.6 (12.3-13.0) | 97.1 (94.6-99.7) | - |

**Table A4:** Multivariable linear regression analysis of predictors of knowledge score

| Knowledge score | Coefficient | Std. Error | *p*-value | 95% Conf. Interval |
| --- | --- | --- | --- | --- |
| Facility type |  |  |  |  |
| Dispensary (Ref) |  |  |  |  |
| Health Centre | 0.005 | 2.993 | 0.999 | -5.969 - 5.980 |
| Hospital | 3.099 | 3.148 | 0.328 | -3.184 - 9.382 |
| Health worker cadre |  |  |  |  |
| Nursing Officer (Ref) |  |  |  |  |
| Clinical Officer | 8.970 | 2.508 | 0.001 | 3.965 - 13.975 |
| Medical Officer | 9.339 | 4.546 | 0.044 | 0.266 - 18.412 |
| Consultant Physician | 9.339 | 4.471 | 0.058 | -0.339 - 19.017 |
| Constant | **87.562** | **4.849** | **0.000** | **85.276 - 89.849** |

**Table A5**: Mixed effects model accounting for facility clustering

| Knowledge score | Coefficient | Std. Error | *p*-value | 95% Conf. Interval |
| --- | --- | --- | --- | --- |
| Facility type |  |  |  |  |
| Dispensary (Ref) |  |  |  |  |
| Health Centre | 0.030 | 3.045 | 0.992 | -5.939 - 5.998 |
| Hospital | 3.180 | 3.237 | 0.326 | -3.164 - 9.523 |
| Health worker cadre |  |  |  |  |
| Nursing Officer (Ref) |  |  |  |  |
| Clinical Officer | 8.724 | 2.335 | 0.000 | 4.147 - 13.301 |
| Medical Officer | 9.225 | 4.132 | 0.026 | 1.125 - 17.323 |
| Consultant Physician | 9.390 | 4.471 | 0.036 | 0.626 - 18.153 |
| Constant | 87.631 | 1.152 | 0.000 | 85.374 - 89.889 |

**Reference**

1. Oyando R, Kagwanja N, Diallo BA, Hassan S, Badjie J, Lucinde R, et al. Access to hypertension services and health-seeking experiences in rural Coastal Kenya: A qualitative study. PLOS Global Public Health. 2025;5(11):e0004324.
